# Supplementary material
Source: PubMed Central journal article supplement (PMC2762474)

## Supplementary information

Table S1. Hospitalization rates (per 100,000 children per year) by year of surveillance and stratified by age group for (a) cases of severe or very severe pneumonia and (b) cases of RSV associated severe or very severe pneumonia.

Fig.S1. Seasonal variation in monthly admissions to Kilifi District Hospital of children under 5 years of age over the period January 2002 to December 2007 and corresponding meteorological recordings. Upper panel: total admissions (dark grey line), children with severe or very severe pneumonia (light grey), and cases of RSV (dark grey shaded area). Lower panel: Mean maximum daily temperature, °C (open squares), mean daily percentage relative humidity, RH% (filled diamonds), and mean daily rainfall, mm (dashed shaded area).

Table S1. Hospitalization rates per 100,000 children by year of surveillance and stratified by age group for (a) cases of severe or very severe pneumonia and (b) cases of RSV associated severe or very severe pneumonia.

| (a)       | age, in months                |      |      |       |       |       |      |      |
|-----------|-------------------------------|------|------|-------|-------|-------|------|------|
|           | 0-2                           | 3-5  | 6-11 | 12-23 | 24-35 | 36-59 | 0-11 | 0-59 |
| year      | admissions / 100,000 children |      |      |       |       |       |      |      |
| 2002-2003 | 10304                         | 5789 | 5216 | 2268  | 960   | 557   | 6750 | 2026 |
| 2003-2004 | 8852                          | 5996 | 4009 | 2261  | 1325  | 551   | 5626 | 2078 |
| 2004-2005 | 9740                          | 5847 | 4579 | 2385  | 1203  | 489   | 6143 | 2182 |
| 2005-2006 | 8698                          | 6611 | 3507 | 1870  | 750   | 331   | 5683 | 1813 |
| 2006-2007 | 8046                          | 4820 | 3840 | 1459  | 753   | 384   | 5108 | 1716 |
| 2002-2007 | 9027                          | 5319 | 3963 | 1961  | 999   | 449   | 5528 | 1912 |
| (b)       | age, in months                |      |      |       |       |       |      |      |
|           | 0-2                           | 3-5  | 6-11 | 12-23 | 24-35 | 36-59 | 0-11 | 0-59 |
| year      | admissions / 100,000 children |      |      |       |       |       |      |      |
| 2002-2003 | 2636                          | 1468 | 1052 | 213   | 31    | 18    | 1587 | 323  |
| 2003-2004 | 1246                          | 841  | 372  | 145   | 112   | 24    | 692  | 202  |
| 2004-2005 | 2419                          | 1253 | 806  | 186   | 98    | 14    | 1306 | 326  |
| 2005-2006 | 1999                          | 1989 | 685  | 273   | 153   | 24    | 1356 | 373  |
| 2006-2007 | 1724                          | 955  | 652  | 172   | 87    | 0     | 989  | 274  |
| 2002-2007 | 1976                          | 1169 | 658  | 190   | 98    | 15    | 1107 | 293  |

Note: The estimation procedures follows that described in the main text Methods.

Fig. S1

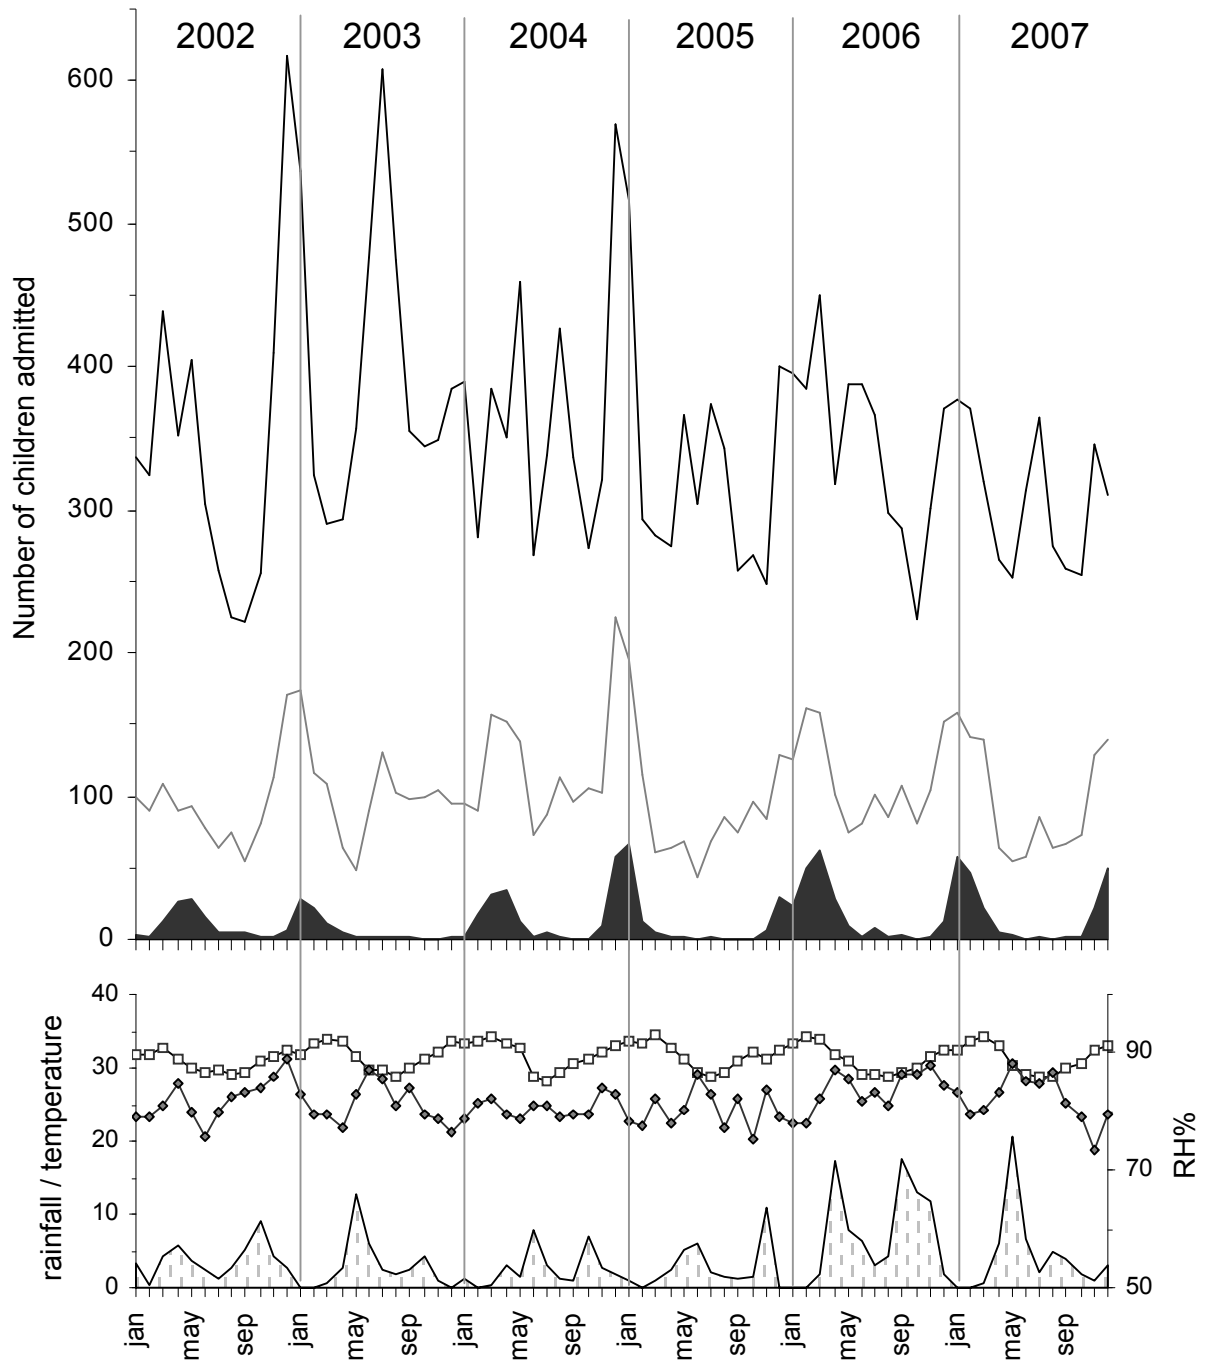

Supplement: NIHMS27208-supplement-1.pdf [file NIHMS27208-supplement-1.pdf]
